# Supplementary material for: Phytobiomes are compositionally nested from the ground up
Source: PeerJ. 2019 Mar 18;7:e6609. doi: 10.7717/peerj.6609 (PMC6428039; doi:10.7717/peerj.6609)
Supplement: Table S1 [file peerj-07-6609-s003.xlsx]

## Sheet: Table_S1_Soil_Metadata
Table S1	Site characteristics
Site	Site ID	Latitude	Longitude	Soil pH	Soil type	Soil Description	Annual Rainfall	Temperature (annual mean)
		degrees	degrees				mm/yr	°c
Makapuu	S04	21.3136	-157.661	7.26	N/A	Rock Outcrop	708.906	23.4167
Sherwoods	S03	21.3474	-157.704	8.48	Carbonatic, isohyperthermic, typic ustipsamments	Jaucas sand, 0 - 15% slopes, MLRA 163	857.981	23.5992
Kailua	M02	21.3951	-157.722	7.69	Fine, smectitic, isohyperthermic chromic haplusterts	Kokokahi very s-ny clay, 0 - 35% slopes	856.03	23.6028
Kailua	S02	21.3951	-157.722	7.19	Fine, smectitic, isohyperthermic, chromic haplusterts	Kokokahi very s-ny clay, 0 - 35% slopes	856.03	23.6028
Kailua	M07	21.3953	-157.722	8.05	Fine, smectitic, isohyperthermic, chromic haplusterts	Kokokahi very s-ny clay, 0 - 35% slopes	856.03	23.6028
Kailua	M08	21.3953	-157.722	7.91	Fine, smectitic, isohyperthermic, chromic haplusterts	Kokokahi very s-ny clay, 0 - 35% slopes	856.03	23.6028
Kailua	M09	21.3954	-157.722	6.97	Fine, smectitic, isohyperthermic, chromic haplusterts	Kokokahi very s-ny clay, 0 - 35% slopes	856.03	23.6028
Kailua	M10	21.3954	-157.721	7.29	Fine, smectitic, isohyperthermic, chromic haplusterts	Kokokahi very s-ny clay, 0 - 35% slopes	856.03	23.6028
Kailua	M03	21.3955	-157.723	8.65	Carbonatic, isohyperthermic, typic ustipsamments	Jaucas sand, 0 - 15% slopes, MLRA 163	856.03	23.6028
Kailua	M04	21.3955	-157.723	8.45	Carbonatic, isohyperthermic, typic ustipsamments	Jaucas sand, 0 - 15% slopes, MLRA 163	856.03	23.6028
Kailua	M05	21.3956	-157.723	8.81	Carbonatic, isohyperthermic, typic ustipsamments	Jaucas sand, 0 - 15% slopes, MLRA 163	856.03	23.6028
Kailua	M06	21.3956	-157.723	8.32	Carbonatic, isohyperthermic, typic ustipsamments	Jaucas sand, 0 - 15% slopes, MLRA 163	856.03	23.6028
Kaneohe	S01	21.4224	-157.746	7.11	Carbonatic, isohyperthermic, typic ustipsamments	Jaucas sand, 0 - 15% slopes, MLRA 163	969.753	23.6172
Heeia	M01	21.442	-157.808	5.28	Fine, parasequic, isohyperthermic ustic palehumults	Alaeloa silty clay, older substrate, 15 - 35% slopes, MLRA 167	1260.04	23.4164
Waiahole	N01	21.4855	-157.848	6.63	Very-fine, mixed, semiactive, nonacid, isohyperthermic typic endoaquepts	Hanalei silty clay, 0 - 2% slopes, MLRA 167	1558.99	23.2141
Kalaeoio	N02	21.5358	-157.84	7.75	Very-fine, mixed, superactive, isohyperthermic Pachic Haplus-lls	Waialua s-ny silty clay, 12 - 30% slopes	1333.73	23.1157
Punaluu	N03	21.5794	-157.885	8.3	Carbonatic, isohyperthermic, typic ustipsamments	Jaucas sand, 0 - 15% slopes, MLRA 163	1541.1	23.3323
Kokoloilo	N04	21.6253	-157.92	7.71	Carbonatic, isohyperthermic, typic ustipsamments	Jaucas sand, 0 - 15% slopes, MLRA 163	1592.23	23.2965
Malaekahana	N05	21.6701	-157.939	7.17	Carbonatic, isohyperthermic, typic ustipsamments	Jaucas sand, 0 - 15% slopes, MLRA 163	1171.06	23.5554
