# Supplementary material for: Phytobiomes are compositionally nested from the ground up
Source: PeerJ. 2019 Mar 18;7:e6609. doi: 10.7717/peerj.6609 (PMC6428039; doi:10.7717/peerj.6609)
Supplement: Table S2 [file peerj-07-6609-s004.xlsx]

## Sheet: Sheet1
Table S4. Mantel tests measure the correlation between geographic distance and microbial community dissimilarity for Scaevola taccada surface microbes. Sample sites occur as 10 locations spanning 60 km on the island of Oahu, HI. Mantel’s statistic measure Pearson’s product-moment correlation with 999 permutations. Significant values indicating a relationship between spatial distance and community…
Plant Part	r-value	p-value	n
All plant parts	0.02711	0.235	86
Above-ground	0.02606	0.334	56
Below-ground	0.2716	0.005	30
Soil	0.117	0.159	17
