# Supplementary material for: Phytobiomes are compositionally nested from the ground up
Source: PeerJ. 2019 Mar 18;7:e6609. doi: 10.7717/peerj.6609 (PMC6428039; doi:10.7717/peerj.6609)
Supplement: Table S3 [file peerj-07-6609-s005.xlsx]

## Sheet: Sheet1
Phytobiomes are compositionally nested from the ground up
Anthony S. Amend, Gerald M. Cobian, Áki J. Láruson, Kristina Remple, Sarah J. Tucker, Kirsten E. Poff, Carmen Antaky, Andre Boraks, Casey A. Jones, Donna Kuehu, Becca R. Lensing, Mersedeh Pejhanmehr, Daniel Richardson, Paul P. Riley
SI Indicator species for each plant part. Pvalues are adjusted for multiple hypothesis testing.
Phylum	Class	Order	Family	Genus	Species
Group	Axil	#sps.	50			stat	p.value
Proteobacteria	Alphaproteobacteria	Rhizobiales	Aurantimonadaceae			0.817	0.015
Proteobacteria	Alphaproteobacteria	Rhizobiales	Methylobacteriaceae			0.807	0.005
Proteobacteria	Alphaproteobacteria	Sphingomonadales	Sphingomonadaceae	Sphingomonas		0.804	0.015
Proteobacteria	Alphaproteobacteria	Sphingomonadales	Sphingomonadaceae			0.791	0.04
Proteobacteria	Alphaproteobacteria	Rhizobiales	Aurantimonadaceae			0.749	0.015
Proteobacteria	Alphaproteobacteria	Sphingomonadales	Erythrobacteraceae			0.735	0.015
Proteobacteria	Alphaproteobacteria	Sphingomonadales	Sphingomonadaceae	Sphingomonas		0.729	0.02
Proteobacteria	Alphaproteobacteria	Sphingomonadales	Sphingomonadaceae	Sphingomonas		0.728	0.005
Proteobacteria	Alphaproteobacteria	Sphingomonadales	Sphingomonadaceae	Sphingomonas		0.723	0.005
Proteobacteria	Alphaproteobacteria	Sphingomonadales	Sphingomonadaceae			0.717	0.03
Actinobacteria	Actinobacteria	Actinomycetales	Kineosporiaceae			0.705	0.005
Proteobacteria	Alphaproteobacteria	Rhizobiales	Aurantimonadaceae			0.689	0.01
Proteobacteria	Alphaproteobacteria	Sphingomonadales	Sphingomonadaceae	Sphingomonas		0.687	0.025
Proteobacteria	Alphaproteobacteria	Sphingomonadales	Sphingomonadaceae	Sphingomonas		0.676	0.025
Proteobacteria	Alphaproteobacteria	Sphingomonadales	Sphingomonadaceae	Sphingobium		0.676	0.005
Proteobacteria	Alphaproteobacteria	Sphingomonadales	Sphingomonadaceae	Sphingomonas		0.67	0.005
Actinobacteria	Actinobacteria	Actinomycetales	Geodermatophilaceae			0.658	0.005
Actinobacteria	Actinobacteria	Actinomycetales	Kineosporiaceae	Kineococcus		0.654	0.035
Proteobacteria	Alphaproteobacteria	Sphingomonadales	Sphingomonadaceae			0.654	0.02
Proteobacteria	Alphaproteobacteria	Rhodospirillales	Acetobacteraceae			0.649	0.03
Proteobacteria	Alphaproteobacteria	Rhizobiales	Aurantimonadaceae			0.643	0.015
Actinobacteria	Actinobacteria	Actinomycetales	Geodermatophilaceae			0.63	0.015
Proteobacteria	Alphaproteobacteria	Sphingomonadales	Sphingomonadaceae	Sphingomonas		0.628	0.035
Proteobacteria	Alphaproteobacteria	Sphingomonadales	Sphingomonadaceae			0.627	0.03
Actinobacteria	Actinobacteria	Actinomycetales	Geodermatophilaceae			0.624	0.01
Proteobacteria	Alphaproteobacteria	Sphingomonadales	Sphingomonadaceae	Sphingomonas		0.616	0.03
Proteobacteria	Alphaproteobacteria	Rhizobiales	Aurantimonadaceae			0.616	0.02
Proteobacteria	Alphaproteobacteria	Rhizobiales	Methylobacteriaceae	Methylobacterium	hispanicum	0.598	0.015
Actinobacteria	Actinobacteria	Actinomycetales	Cellulomonadaceae	Cellulomonas		0.594	0.025
Proteobacteria	Alphaproteobacteria	Rhizobiales	Beijerinckiaceae			0.594	0.03
Proteobacteria	Alphaproteobacteria	Rhodospirillales	Acetobacteraceae			0.59	0.03
Bacteroidetes	Cytophagia	Cytophagales	Cytophagaceae	Spirosoma		0.579	0.045
Proteobacteria	Alphaproteobacteria	Rhodospirillales	Acetobacteraceae			0.576	0.04
Proteobacteria	Alphaproteobacteria	Sphingomonadales	Sphingomonadaceae	Sphingomonas		0.574	0.02
Proteobacteria	Alphaproteobacteria	Sphingomonadales	Sphingomonadaceae	Novosphingobium		0.571	0.045
Proteobacteria	Alphaproteobacteria	Rhizobiales	Aurantimonadaceae			0.562	0.03
Proteobacteria	Alphaproteobacteria	Sphingomonadales	Sphingomonadaceae	Sphingomonas		0.562	0.04
Proteobacteria	Alphaproteobacteria	Sphingomonadales	Erythrobacteraceae			0.561
Proteobacteria	Alphaproteobacteria	Sphingomonadales	Sphingomonadaceae			0.56	0.03
Proteobacteria	Alphaproteobacteria	Rhizobiales				0.552	0.01
Proteobacteria	Alphaproteobacteria	Rhizobiales	Methylobacteriaceae	Methylobacterium		0.548	0.03
Proteobacteria	Alphaproteobacteria	Rhizobiales	Aurantimonadaceae			0.534	0.02
Bacteroidetes	Cytophagia	Cytophagales	Cytophagaceae	Dyadobacter		0.521	0.035
Proteobacteria	Alphaproteobacteria	Rhizobiales	Methylobacteriaceae			0.506	0.05
Proteobacteria	Alphaproteobacteria	Rhodospirillales	Acetobacteraceae			0.494	0.025
Planctomycetes	Phycisphaerae	WD2101				0.494	0.05
Actinobacteria	Actinobacteria	Actinomycetales	Cellulomonadaceae	Cellulomonas		0.479	0.05
Actinobacteria	Actinobacteria	Actinomycetales	Microbacteriaceae			0.476	0.05
Proteobacteria	Deltaproteobacteria	Myxococcales				0.464	0.03
Proteobacteria	Alphaproteobacteria	Sphingomonadales	Sphingomonadaceae	Sphingomonas		0.421	0.045
Group	Flower	#sps.	25
						stat	p.value
Actinobacteria	Actinobacteria	Actinomycetales	Micrococcaceae	Micrococcus		0.714	0.015
Chloroflexi	Anaerolineae	SBR1031	Ab			0.577	0.03
Planctomycetes	Planctomycetia	Pirellulales	Pirellulaceae			0.577	0.015
Proteobacteria	Gammaproteobacteria	Oceanospirillales	Oceanospirillaceae	Marinomonas		0.577	0.015
Planctomycetes	Planctomycetia	Pirellulales	Pirellulaceae			0.576	0.015
Proteobacteria	Gammaproteobacteria	Pseudomonadales	Moraxellaceae	Acinetobacter		0.574	0.03
Bacteroidetes	Cytophagia	Cytophagales				0.571	0.02
Proteobacteria	Gammaproteobacteria	Pseudomonadales	Moraxellaceae	Acinetobacter		0.571	0.03
Proteobacteria	Alphaproteobacteria	Rhodospirillales	Acetobacteraceae			0.557	0.015
Actinobacteria	Actinobacteria	Actinomycetales	Corynebacteriaceae	Corynebacterium	durum	0.553	0.02
Gemmatimonadetes	Gemm-1					0.552	0.015
Cyanobacteria	Chloroplast	Stramenopiles				0.549	0.02
Planctomycetes	Planctomycetia	Pirellulales	Pirellulaceae			0.549	0.005
Proteobacteria	Gammaproteobacteria	Vibrionales	Pseudoalteromonadaceae			0.546	0.025
Proteobacteria	Betaproteobacteria	Burkholderiales	Oxalobacteraceae			0.546	0.025
Proteobacteria	Alphaproteobacteria	Rhodobacterales	Rhodobacteraceae			0.538	0.025
Actinobacteria	Actinobacteria	Actinomycetales	Mycobacteriaceae	Mycobacterium		0.537	0.025
Planctomycetes	Planctomycetia	Pirellulales	Pirellulaceae			0.528	0.005
Proteobacteria	Gammaproteobacteria	Pseudomonadales	Pseudomonadaceae	Pseudomonas		0.506	0.035
Firmicutes	Bacilli	Gemellales	Gemellaceae			0.504	0.03
Proteobacteria	Gammaproteobacteria	Pseudomonadales	Pseudomonadaceae	Pseudomonas	viridiflava	0.501	0.04
Gemmatimonadetes	Gemm-5					0.493	0.025
Proteobacteria	Alphaproteobacteria	Rhodospirillales	Acetobacteraceae	Gluconobacter		0.49	0.025
Actinobacteria	Actinobacteria	Actinomycetales	Micrococcaceae	Micrococcus		0.478	0.05
Acidobacteria	[Chloracidobacteria]	RB41	Ellin			0.477	0.04
Group	Fruit	#sps.	4
						stat	p.value
Proteobacteria	Gammaproteobacteria	Salinisphaerales	Salinisphaeraceae	Salinisphaera		0.836	0.005
Proteobacteria	Gammaproteobacteria	Pseudomonadales	Moraxellaceae	Acinetobacter		0.795	0.01
Proteobacteria	Gammaproteobacteria	Pseudomonadales	Moraxellaceae	Acinetobacter		0.661	0.02
Proteobacteria	Gammaproteobacteria	Pseudomonadales	Moraxellaceae	Acinetobacter		0.603	0.02
Group	Leaf	#sps.	10
						stat	p.value
Proteobacteria	Alphaproteobacteria	Sphingomonadales	Sphingomonadaceae			0.665	0.02
Proteobacteria	Gammaproteobacteria	Xanthomonadales	Xanthomonadaceae			0.599	0.015
Proteobacteria	Alphaproteobacteria	Sphingomonadales	Sphingomonadaceae			0.594	0.015
Proteobacteria	Alphaproteobacteria	Sphingomonadales	Sphingomonadaceae			0.568	0.04
Planctomycetes	Planctomycetia	Pirellulales	Pirellulaceae			0.56	0.03
Proteobacteria	Gammaproteobacteria	Xanthomonadales	Xanthomonadaceae			0.539	0.04
Actinobacteria	Actinobacteria	Actinomycetales	Micrococcaceae			0.535	0.04
Proteobacteria	Gammaproteobacteria	Alteromonadales	Alteromonadaceae	Marinobacter		0.506	0.025
Proteobacteria	Gammaproteobacteria	Xanthomonadales	Xanthomonadaceae	Lysobacter		0.487	0.03
Proteobacteria	Alphaproteobacteria	Sphingomonadales	Sphingomonadaceae			0.479	0.05
Group	Soil	#sps.	60
						stat	p.value
Firmicutes	Bacilli	Bacillales	Planococcaceae	Lysinibacillus		0.921	0.005
Firmicutes	Bacilli	Bacillales	Planococcaceae			0.871	0.005
Firmicutes	Bacilli	Bacillales	Planococcaceae			0.866	0.005
Firmicutes	Bacilli	Bacillales	Planococcaceae			0.798	0.005
Actinobacteria	Acidimicrobiia	Acidimicrobiales				0.798	0.01
Firmicutes	Bacilli	Bacillales	Bacillaceae	Bacillus		0.794	0.005
Firmicutes	Bacilli	Bacillales	Bacillaceae	Bacillus		0.786	0.005
Actinobacteria	Acidimicrobiia	Acidimicrobiales				0.776	0.02
Firmicutes	Bacilli	Bacillales	Planococcaceae			0.769	0.005
Actinobacteria	Acidimicrobiia	Acidimicrobiales				0.764	0.015
Firmicutes	Bacilli	Bacillales	Bacillaceae	Bacillus		0.758	0.005
Firmicutes	Bacilli	Bacillales	Planococcaceae			0.74	0.01
Firmicutes	Bacilli	Bacillales	Planococcaceae	Solibacillus		0.729	0.005
Firmicutes	Bacilli	Bacillales	Paenibacillaceae	Paenibacillus		0.729	0.02
Actinobacteria	Acidimicrobiia	Acidimicrobiales				0.728	0.005
Firmicutes	Bacilli	Bacillales	Bacillaceae	Bacillus	muralis	0.728	0.005
Firmicutes	Bacilli	Bacillales	Bacillaceae	Bacillus		0.703	0.005
Firmicutes	Bacilli	Bacillales	Planococcaceae	Solibacillus		0.702	0.01
Firmicutes	Bacilli	Bacillales	Planococcaceae			0.702	0.005
Firmicutes	Bacilli	Bacillales	Planococcaceae			0.701	0.005
Firmicutes	Bacilli	Bacillales	Planococcaceae			0.7	0.005
Firmicutes	Bacilli	Bacillales	Planococcaceae	Solibacillus		0.698	0.005
Firmicutes	Bacilli	Bacillales	Bacillaceae	Bacillus	muralis	0.686	0.005
Firmicutes	Bacilli	Bacillales	Paenibacillaceae	Paenibacillus		0.686	0.015
Actinobacteria	Acidimicrobiia	Acidimicrobiales				0.671	0.015
Firmicutes	Bacilli	Bacillales	Paenibacillaceae	Paenibacillus		0.661	0.035
Firmicutes	Bacilli	Bacillales	Bacillaceae	Bacillus		0.644	0.025
Firmicutes	Bacilli	Bacillales	Planococcaceae			0.642	0.015
Firmicutes	Bacilli	Bacillales	Planococcaceae			0.642	0.015
Firmicutes	Bacilli	Bacillales	Bacillaceae			0.621	0.025
Firmicutes	Bacilli	Bacillales	Planococcaceae			0.607	0.015
Firmicutes	Bacilli	Bacillales	Planococcaceae			0.603	0.02
Firmicutes	Bacilli	Bacillales	Planococcaceae			0.594	0.02
Firmicutes	Bacilli	Bacillales	Paenibacillaceae	Paenibacillus		0.593	0.01
Firmicutes	Bacilli	Bacillales	Bacillaceae	Bacillus		0.583	0.02
Planctomycetes	Planctomycetia	Planctomycetales	Planctomycetaceae	Planctomyces		0.581	0.015
Actinobacteria	Acidimicrobiia	Acidimicrobiales				0.579	0.02
Chloroflexi	Anaerolineae	SBR1031	Ab			0.578	0.02
Firmicutes	Bacilli	Bacillales	Planococcaceae	Lysinibacillus0		0.578	0.015
Planctomycetes	Planctomycetia	Planctomycetales	Planctomycetaceae	Planctomyces		0.574	0.02
Actinobacteria	Acidimicrobiia	Acidimicrobiales				0.572	0.01
Proteobacteria	Alphaproteobacteria	Sphingomonadales	Sphingomonadaceae	Kaistobacter		0.563	0.035
Planctomycetes	Planctomycetia	B97				0.555	0.025
Proteobacteria	Alphaproteobacteria	Rhodobacterales	Rhodobacteraceae			0.545	0.05
Firmicutes	Bacilli	Bacillales	Planococcaceae			0.544	0.02
Proteobacteria	Alphaproteobacteria	Sphingomonadales	Sphingomonadaceae	Kaistobacter		0.539	0.03
Firmicutes	Bacilli	Bacillales	Bacillaceae			0.528	0.015
Actinobacteria	Acidimicrobiia	Acidimicrobiales				0.522	0.02
Firmicutes	Bacilli	Bacillales	Planococcaceae	Lysinibacillus		0.52	0.015
Actinobacteria	Acidimicrobiia	Acidimicrobiales				0.518	0.045
Firmicutes	Bacilli	Bacillales	Paenibacillaceae	Paenibacillus		0.513	0.01
Acidobacteria	Acidobacteria-6	iii1-15				0.512	0.04
Planctomycetes	Planctomycetia	Gemmatales	Gemmataceae	Gemmata		0.509	0.03
Firmicutes	Bacilli	Bacillales	Bacillaceae	Oceanobacillus		0.507	0.03
Actinobacteria	Thermoleophilia	Gaiellales	Gaiellaceae			0.477	0.045
Firmicutes	Bacilli	Bacillales	Bacillaceae	Bacillus		0.47	0.045
Chloroflexi	Thermomicrobia	AKYG1722				0.455	0.04
Proteobacteria	Alphaproteobacteria	Sphingomonadales	Sphingomonadaceae	Kaistobacter		0.449	0.05
Gemmatimonadetes	Gemm-3					0.446	0.035
Gemmatimonadetes	Gemm-5					0.42	0.045
Group	Stem	#sps.	16
						stat	p.value
Actinobacteria	Actinobacteria	Actinomycetales	Pseudonocardiaceae	Actinomycetospora		0.848	0.035
Proteobacteria	Alphaproteobacteria	Rhodobacterales	Rhodobacteraceae	Paracoccus	aminovorans	0.709	0.005
Proteobacteria	Alphaproteobacteria	Rhizobiales	Beijerinckiaceae			0.671	0.035
Actinobacteria	Actinobacteria	Actinomycetales	Microbacteriaceae			0.667	0.045
Actinobacteria	Actinobacteria	Actinomycetales				0.663	0.03
Actinobacteria	Actinobacteria	Actinomycetales	Kineosporiaceae			0.655	0.04
Proteobacteria	Alphaproteobacteria	Sphingomonadales	Sphingomonadaceae			0.634	0.05
Actinobacteria	Actinobacteria	Actinomycetales	Microbacteriaceae			0.625	0.035
Proteobacteria	Alphaproteobacteria	Rhizobiales	Beijerinckiaceae			0.617	0.045
Bacteroidetes	[Saprospirae]	[Saprospirales]	Chitinophagaceae			0.609	0.025
Proteobacteria	Alphaproteobacteria	Caulobacterales	Caulobacteraceae			0.602	0.03
Proteobacteria	Alphaproteobacteria	Sphingomonadales	Sphingomonadaceae	Sphingomonas		0.581	0.045
Proteobacteria	Alphaproteobacteria	Sphingomonadales	Sphingomonadaceae	Sphingomonas		0.57	0.035
Proteobacteria	Alphaproteobacteria	Sphingomonadales	Sphingomonadaceae	Sphingomonas		0.55	0.025
Proteobacteria	Alphaproteobacteria	Sphingomonadales	Sphingomonadaceae	Sphingomonas0		0.528	0.025
Proteobacteria	Alphaproteobacteria	Rhodobacterales	Rhodobacteraceae	Paracoccus		0.523	0.045
Group	Rhizosphere	#sps.	602
						stat	p.value
Actinobacteria	Actinobacteria	Actinomycetales	Nocardioidaceae			0.508242	0.02
Actinobacteria	Rubrobacteria	Rubrobacterales	Rubrobacteraceae	Rubrobacter		0.480384	0.035
Chloroflexi	Anaerolineae	Caldilineales	Caldilineaceae			0.480384	0.03
Proteobacteria	Alphaproteobacteria	Caulobacterales	Caulobacteraceae	Asticcacaulis		0.480384	0.03
Proteobacteria	Alphaproteobacteria	Rhodobacterales	Rhodobacteraceae			0.43519	0.05
Proteobacteria	Alphaproteobacteria	Rhodospirillales				0.480384	0.035
Verrucomicrobia	[Spartobacteria]	[Chthoniobacterales]	[Chthoniobacteraceae]	Chthoniobacter		0.44015	0.05
Gemmatimonadetes	Gemmatimonadetes					0.532537	0.005
Proteobacteria	Gammaproteobacteria	Xanthomonadales	Xanthomonadaceae			0.480384	0.05
Acidobacteria	Acidobacteria-6	iii1-15				0.485154	0.045
Acidobacteria	Acidobacteria-6	iii1-15	RB			0.463007	0.04
Actinobacteria	Actinobacteria	Actinomycetales	Pseudonocardiaceae	Pseudonocardia		0.530611	0.005
Proteobacteria	Alphaproteobacteria	Caulobacterales	Caulobacteraceae			0.480384	0.045
Proteobacteria	Alphaproteobacteria	Rhizobiales				0.577577	0.005
Proteobacteria	Alphaproteobacteria	Rhodobacterales	Hyphomonadaceae			0.480384	0.05
Proteobacteria	Alphaproteobacteria	Sphingomonadales	Sphingomonadaceae			0.59774	0.01
Actinobacteria	Actinobacteria	Actinomycetales	Corynebacteriaceae	Corynebacterium		0.467198	0.015
Gemmatimonadetes	Gemmatimonadetes					0.480384	0.03
Planctomycetes	Phycisphaerae	Phycisphaerales				0.5547	0.005
Planctomycetes	Planctomycetia	Pirellulales	Pirellulaceae			0.679366	0.005
Planctomycetes	Planctomycetia	Planctomycetales	Planctomycetaceae	Planctomyces		0.479211	0.015
Proteobacteria	Alphaproteobacteria	Caulobacterales	Caulobacteraceae	Mycoplana		0.5166	0.03
Proteobacteria	Alphaproteobacteria	Rhizobiales	Hyphomicrobiaceae	Devosia		0.5547	0.005
Proteobacteria	Alphaproteobacteria	Rhizobiales	Rhodobiaceae	Afifella		0.620174	0.005
Proteobacteria	Deltaproteobacteria	Myxococcales	Haliangiaceae			0.513077	0.02
Proteobacteria	Deltaproteobacteria	Syntrophobacterales	Syntrophobacteraceae			0.508242	0.04
Acidobacteria	Acidobacteria-6	iii1-15				0.504723	0.01
Bacteroidetes	[Saprospirae]	[Saprospirales]	Chitinophagaceae			0.679366	0.005
Bacteroidetes	[Saprospirae]	[Saprospirales]	Chitinophagaceae			0.480384	0.05
Planctomycetes	Phycisphaerae	WD2101				0.480384	0.025
Planctomycetes	Planctomycetia	Gemmatales	Gemmataceae	Gemmata		0.522408	0.005
Proteobacteria	Alphaproteobacteria	Rhodospirillales	Rhodospirillaceae			0.539072	0.01
Verrucomicrobia	[Spartobacteria]	[Chthoniobacterales]	DZ			0.480384	0.045
Acidobacteria	Acidobacteria-6	iii1-15				0.65941	0.02
Actinobacteria	Actinobacteria	Actinomycetales	Actinosynnemataceae			0.480384	0.05
Actinobacteria	Thermoleophilia	Solirubrobacterales				0.537828	0.01
Bacteroidetes	[Saprospirae]	[Saprospirales]	Chitinophagaceae			0.459933	0.045
Proteobacteria	Betaproteobacteria	Burkholderiales	Comamonadaceae			0.531085	0.005
Proteobacteria	Gammaproteobacteria	Alteromonadales	ds			0.5547	0.005
Proteobacteria	Alphaproteobacteria	Kiloniellales				0.526678	0.01
Proteobacteria	Alphaproteobacteria	Rhizobiales	Rhizobiaceae	Agrobacterium		0.480384	0.04
Proteobacteria	Gammaproteobacteria	Thiotrichales	Piscirickettsiaceae			0.530611	0.01
Actinobacteria	Acidimicrobiia	Acidimicrobiales	AKIW			0.67653	0.01
Bacteroidetes	[Saprospirae]	[Saprospirales]	Chitinophagaceae			0.577577	0.01
Nitrospirae	Nitrospira	Nitrospirales	-A			0.435515	0.035
Acidobacteria	Acidobacteria-6	iii1-15				0.571772	0.01
Actinobacteria	Actinobacteria	Actinomycetales	Geodermatophilaceae	Geodermatophilus		0.518786	0.02
Actinobacteria	Actinobacteria	Actinomycetales	Pseudonocardiaceae			0.606679	0.005
Actinobacteria	Actinobacteria	Actinomycetales	Pseudonocardiaceae	Pseudonocardia		0.534409	0.03
Actinobacteria	Thermoleophilia	Solirubrobacterales				0.508242	0.045
Actinobacteria	Thermoleophilia	Solirubrobacterales	Conexibacteraceae			0.485407	0.01
Proteobacteria	Alphaproteobacteria	Rhizobiales	Hyphomicrobiaceae			0.480384	0.025
Proteobacteria	Alphaproteobacteria	Rhodobacterales	Hyphomonadaceae			0.620174	0.005
Proteobacteria	Betaproteobacteria	Burkholderiales	Comamonadaceae			0.501875	0.02
Proteobacteria	Deltaproteobacteria	Myxococcales				0.500516	0.01
Acidobacteria	Acidobacteria-6	iii1-15				0.5547	0.005
Acidobacteria	Acidobacteria-6	iii1-15				0.588986	0.005
Actinobacteria	Actinobacteria	Actinomycetales	Nocardioidaceae	Pimelobacter		0.62106	0.01
Actinobacteria	Actinobacteria	Actinomycetales	Streptomycetaceae	Streptomyces		0.5547	0.025
Actinobacteria	Thermoleophilia	Gaiellales	Gaiellaceae			0.499805	0.045
Planctomycetes	Planctomycetia	Planctomycetales	Planctomycetaceae	Planctomyces		0.531315	0.005
Proteobacteria	Alphaproteobacteria	Rhizobiales	Methylocystaceae			0.480384	0.05
Proteobacteria	Alphaproteobacteria	Rhodospirillales	Rhodospirillaceae			0.480384	0.03
Proteobacteria	Deltaproteobacteria	Myxococcales	-G			0.459523	0.025
Acidobacteria	Acidobacteria-6	iii1-15				0.622466	0.015
Acidobacteria	PAUC37f					0.480384	0.04
Proteobacteria	Gammaproteobacteria	Thiotrichales	Piscirickettsiaceae			0.630367	0.015
Proteobacteria	Gammaproteobacteria	Xanthomonadales	Xanthomonadaceae	Dokdonella		0.480384	0.04
Acidobacteria	Acidobacteria-6	iii1-15				0.54328	0.005
Acidobacteria	Acidobacteria-6	iii1-15	mb			0.5547	0.005
Proteobacteria	Alphaproteobacteria	Caulobacterales	Caulobacteraceae	Phenylobacterium		0.51417	0.035
Proteobacteria	Alphaproteobacteria	Rhizobiales642		0
Proteobacteria	Alphaproteobacteria	Rhizobiales	Brucellaceae	Ochrobactrum		0.480384	0.04
Proteobacteria	Alphaproteobacteria	Rhodobacterales	Hyphomonadaceae			0.5547	0.015
Acidobacteria	Acidobacteria-6	iii1-15	RB			0.540923	0.01
Actinobacteria	Actinobacteria	Actinomycetales	Streptomycetaceae	Streptomyces		0.589137	0.01
Bacteroidetes	Cytophagia	Cytophagales	Cytophagaceae			0.480384	0.035
Planctomycetes	Phycisphaerae	Phycisphaerales				0.512835	0.05
Proteobacteria	Alphaproteobacteria	Rhizobiales	Hyphomicrobiaceae	Devosia		0.654791	0.01
Proteobacteria	Alphaproteobacteria	Rhodospirillales	Rhodospirillaceae			0.5547	0.005
Proteobacteria	Deltaproteobacteria	Myxococcales	Myxococcaceae	Myxococcus		0.480384	0.035
Actinobacteria	Actinobacteria	Actinomycetales	Micromonosporaceae			0.496002	0.045
Actinobacteria	Actinobacteria	Actinomycetales	Mycobacteriaceae	Mycobacterium		0.65464	0.005
Planctomycetes	Planctomycetia	Pirellulales	Pirellulaceae			0.571772	0.005
Planctomycetes	Planctomycetia	Planctomycetales	Planctomycetaceae	Planctomyces		0.5547	0.005
Proteobacteria	Alphaproteobacteria	Rhizobiales	Hyphomicrobiaceae	Devosia		0.545703	0.01
Proteobacteria	Deltaproteobacteria	Myxococcales				0.480384	0.03
Proteobacteria	Deltaproteobacteria	NB1-j	NB-i			0.5547	0.005
Acidobacteria	Acidobacteria-6	iii1-15				0.526678	0.01
Acidobacteria	Acidobacteria-6	iii1-15				0.483056	0.015
Acidobacteria	Acidobacteria-6	iii1-15				0.5166	0.01
Actinobacteria	Acidimicrobiia	Acidimicrobiales				0.592049	0.005
Actinobacteria	Actinobacteria	Actinomycetales	Actinosynnemataceae			0.610114	0.01
Actinobacteria	Actinobacteria	Actinomycetales	Nocardioidaceae			0.604945	0.005
Bacteroidetes	[Saprospirae]	[Saprospirales]	Chitinophagaceae			0.5547	0.015
Planctomycetes	Planctomycetia	Gemmatales	Gemmataceae	Gemmata		0.5547	0.01
Proteobacteria	Alphaproteobacteria	Caulobacterales	Caulobacteraceae	Brevundimonas	diminuta	0.537129	0.01
Proteobacteria	Alphaproteobacteria	Rhizobiales	Hyphomicrobiaceae	Rhodoplanes		0.582137	0.015
Proteobacteria	Betaproteobacteria	SC-I-84				0.524433	0.005
Proteobacteria	Gammaproteobacteria	Xanthomonadales	Sinobacteraceae			0.679366	0.005
Verrucomicrobia	[Spartobacteria]	[Chthoniobacterales]	[Chthoniobacteraceae]	Ellin0		0.460934	0.05
Acidobacteria	Acidobacteria-6	iii1-15				0.544868	0.005
Acidobacteria	Acidobacteria-6	iii1-15	RB			0.5547	0.005
Actinobacteria	Acidimicrobiia	Acidimicrobiales				0.699732	0.005
Proteobacteria	Alphaproteobacteria	Rhodospirillales	Rhodospirillaceae			0.524336	0.02
Proteobacteria	Deltaproteobacteria	Myxococcales				0.480384	0.045
Actinobacteria	Actinobacteria	Actinomycetales	Mycobacteriaceae	Mycobacterium		0.530611	0.02
Actinobacteria	Actinobacteria	Actinomycetales	Nocardioidaceae			0.636554	0.005
Proteobacteria	Alphaproteobacteria	Sphingomonadales	Sphingomonadaceae	Kaistobacter		0.689388	0.005
Proteobacteria	Alphaproteobacteria	Rhodospirillales	Rhodospirillaceae			0.667858	0.015
Proteobacteria	Alphaproteobacteria	Rhodospirillales	Rhodospirillaceae			0.5547	0.005
Proteobacteria	Alphaproteobacteria	Sphingomonadales	Sphingomonadaceae	Sphingomonas	wittichii	0.5166	0.04
Acidobacteria	Acidobacteria-6	iii1-15				0.480763	0.035
Planctomycetes	Phycisphaerae	Phycisphaerales				0.5547	0.005
Proteobacteria	Alphaproteobacteria	Rhodospirillales	Rhodospirillaceae			0.46685	0.045
Actinobacteria	Acidimicrobiia	Acidimicrobiales				0.592502	0.01
Actinobacteria	Actinobacteria	Actinomycetales	Streptomycetaceae	Streptomyces		0.512968	0.03
Proteobacteria	Alphaproteobacteria	Rhizobiales	Rhizobiaceae	Sinorhizobium		0.612155	0.02
Proteobacteria	Alphaproteobacteria	Rhodospirillales				0.652714	0.01
Actinobacteria	Acidimicrobiia	Acidimicrobiales	AKIW			0.620174	0.005
Actinobacteria	Actinobacteria	Actinomycetales	Nocardioidaceae			0.660906	0.005
Proteobacteria	Alphaproteobacteria	Rhizobiales	Hyphomicrobiaceae	Devosia		0.5547	0.025
Actinobacteria	Actinobacteria	Actinomycetales	Streptomycetaceae	Streptomyces		0.609668	0.005
Actinobacteria	Actinobacteria	Actinomycetales	Microbacteriaceae	Agromyces		0.504574	0.04
Actinobacteria	Actinobacteria	Actinomycetales	Pseudonocardiaceae	Pseudonocardia		0.480384	0.035
Actinobacteria	Actinobacteria	Actinomycetales	Streptomycetaceae	Streptomyces		0.546575	0.025
Actinobacteria	Actinobacteria	Actinomycetales	Streptomycetaceae	Streptomyces		0.702284	0.005
Planctomycetes	Phycisphaerae	WD2101				0.44892	0.045
Planctomycetes	Planctomycetia	Pirellulales	Pirellulaceae			0.575987	0.005
Proteobacteria	Alphaproteobacteria	Rhizobiales	Methylocystaceae			0.776674	0.005
Proteobacteria	Deltaproteobacteria	Myxococcales	Haliangiaceae			0.537716	0.02
Actinobacteria	Actinobacteria	Actinomycetales	Streptomycetaceae			0.589054	0.01
Actinobacteria	Thermoleophilia	Solirubrobacterales				0.508376	0.01
Bacteroidetes	[Saprospirae]	[Saprospirales]	Chitinophagaceae			0.480384	0.03
Bacteroidetes	Cytophagia	Cytophagales	Cytophagaceae	Adhaeribacter		0.5547	0.005
Proteobacteria	Alphaproteobacteria	Rhizobiales	Hyphomicrobiaceae	Rhodoplanes		0.581358	0.02
Proteobacteria	Alphaproteobacteria	Rhizobiales	Phyllobacteriaceae			0.534635	0.035
Proteobacteria	Alphaproteobacteria	Caulobacterales	Caulobacteraceae			0.775789	0.005
Proteobacteria	Alphaproteobacteria	Rhizobiales				0.522284	0.03
Proteobacteria	Alphaproteobacteria	Rhodospirillales	Rhodospirillaceae			0.5547	0.005
Proteobacteria	Gammaproteobacteria	Xanthomonadales	Sinobacteraceae			0.54779	0.01
Acidobacteria	[Chloracidobacteria]	RB41				0.527477	0.015
Actinobacteria	Actinobacteria	Actinomycetales	Nocardioidaceae	Nocardioides		0.480384	0.03
Actinobacteria	Actinobacteria	Actinomycetales	Streptomycetaceae	Streptomyces		0.526678	0.05
Proteobacteria	Gammaproteobacteria	Alteromonadales	ds			0.5547	0.005
Proteobacteria	Gammaproteobacteria	Xanthomonadales	Sinobacteraceae			0.5547	0.025
Proteobacteria	Alphaproteobacteria					0.600933	0.005
Proteobacteria	Alphaproteobacteria	Rhizobiales				0.424701	0.05
Proteobacteria	Alphaproteobacteria	Rhizobiales	Phyllobacteriaceae			0.463539	0.035
Verrucomicrobia	Verrucomicrobiae	Verrucomicrobiales	Verrucomicrobiaceae	Luteolibacter		0.544868	0.02
Actinobacteria	Acidimicrobiia	Acidimicrobiales	Iamiaceae	Iamia		0.53094	0.015
Actinobacteria	Actinobacteria	Actinomycetales	Streptomycetaceae	Streptomyces		0.618472	0.005
Proteobacteria	Alphaproteobacteria	Rhizobiales	Phyllobacteriaceae			0.803179	0.005
Proteobacteria	Deltaproteobacteria	Myxococcales				0.589752	0.005
Acidobacteria	Acidobacteria-6	iii1-15	RB			0.5547	0.035
Actinobacteria	Acidimicrobiia	Acidimicrobiales				0.53318	0.02
Actinobacteria	Acidimicrobiia	Acidimicrobiales	C			0.480384	0.045
Proteobacteria	Alphaproteobacteria	Rhizobiales	Hyphomicrobiaceae			0.514511	0.015
Proteobacteria	Alphaproteobacteria	Rhodospirillales				0.614182	0.005
Verrucomicrobia	Verrucomicrobiae	Verrucomicrobiales	Verrucomicrobiaceae			0.620174	0.005
Proteobacteria	Alphaproteobacteria	Sphingomonadales	Sphingomonadaceae	Sphingomonas		0.467244	0.04
Proteobacteria	Betaproteobacteria	Burkholderiales	Comamonadaceae			0.500549	0.02
Acidobacteria	Acidobacteria-6	iii1-15				0.590417	0.005
Actinobacteria	Actinobacteria	Actinomycetales	Streptomycetaceae	Streptomyces0		0.467779	0.04
Proteobacteria	Alphaproteobacteria	Rhodospirillales	Rhodospirillaceae			0.617362	0.015
Proteobacteria	Alphaproteobacteria	Rhodospirillales	Rhodospirillaceae			0.784465	0.005
Actinobacteria	Actinobacteria	Actinomycetales	Frankiaceae	Frankia		0.5547	0.01
Actinobacteria	Actinobacteria	Actinomycetales	Nocardioidaceae			0.50334	0.035
Planctomycetes	OM190	agg27				0.673265	0.015
Proteobacteria	Alphaproteobacteria	Ellin329				0.540923	0.03
Proteobacteria	Alphaproteobacteria	Rhizobiales	Hyphomicrobiaceae	Rhodoplanes		0.437814	0.05
Acidobacteria	Acidobacteria-6	iii1-15				0.661539	0.01
Proteobacteria	Alphaproteobacteria	Caulobacterales	Caulobacteraceae	Asticcacaulis	biprosthecium	0.471353	0.045
Actinobacteria	Acidimicrobiia	Acidimicrobiales	Iamiaceae	Iamia		0.596444	0.005
Actinobacteria	Actinobacteria	Actinomycetales				0.620174	0.005
Proteobacteria	Alphaproteobacteria	Caulobacterales	Caulobacteraceae			0.473563	0.045
Proteobacteria	Alphaproteobacteria	Sphingomonadales	Sphingomonadaceae			0.476264	0.045
Proteobacteria	Gammaproteobacteria	Alteromonadales	OM			0.637699	0.005
Actinobacteria	Actinobacteria	Actinomycetales	Microbacteriaceae			0.499805	0.045
Proteobacteria	Alphaproteobacteria	Rhizobiales				0.468393	0.04
Proteobacteria	Alphaproteobacteria	Rhizobiales	Hyphomicrobiaceae			0.571408	0.015
Proteobacteria	Alphaproteobacteria	Rhizobiales	Rhodobiaceae	Afifella		0.519327	0.03
Proteobacteria	Deltaproteobacteria	Myxococcales	Haliangiaceae			0.51417	0.035
Proteobacteria	Deltaproteobacteria	Myxococcales	Haliangiaceae			0.519982	0.015
Proteobacteria	Alphaproteobacteria	Rhodospirillales	Rhodospirillaceae	Phaeospirillum	fulvum	0.607052	0.01
Proteobacteria	Alphaproteobacteria	Sphingomonadales	Sphingomonadaceae			0.642616	0.005
Proteobacteria	Gammaproteobacteria	Pseudomonadales	Pseudomonadaceae	Pseudomonas		0.620174	0.01
Acidobacteria	Acidobacteria-6	iii1-15	mb			0.531226	0.02
Acidobacteria	Acidobacteria-6	iii1-15	RB			0.610901	0.005
Actinobacteria	Actinobacteria	Actinomycetales	Intrasporangiaceae			0.719489	0.01
Bacteroidetes	Sphingobacteriia	Sphingobacteriales				0.474745	0.05
Chloroflexi	TK17					0.659743	0.005
Nitrospirae	Nitrospira	Nitrospirales	-A			0.598753	0.015
Proteobacteria	Alphaproteobacteria	Rhizobiales	Hyphomicrobiaceae	Hyphomicrobium		0.628404	0.005
Proteobacteria	Deltaproteobacteria	Myxococcales				0.5547	0.005
Actinobacteria	Acidimicrobiia	Acidimicrobiales				0.535965	0.035
Chloroflexi	Anaerolineae	SBR1031	Ab			0.5945	0.01
Proteobacteria	Betaproteobacteria	Burkholderiales	Alcaligenaceae			0.705227	0.005
Proteobacteria	Betaproteobacteria	Ellin6067				0.61497	0.01
Proteobacteria	Deltaproteobacteria	Syntrophobacterales	Syntrophobacteraceae			0.54067	0.02
Actinobacteria	Acidimicrobiia	Acidimicrobiales1204				0.487609	0.035
Actinobacteria	Actinobacteria	Actinomycetales	Micromonosporaceae			0.620174	0.005
Bacteroidetes	Cytophagia	Cytophagales	Cytophagaceae			0.480384	0.03
Chloroflexi	S085					0.708795	0.005
Proteobacteria	Alphaproteobacteria	Sphingomonadales	Sphingomonadaceae	Sphingobium		0.461584	0.05
Gemmatimonadetes	Gemm-1					0.697915	0.005
Proteobacteria	Alphaproteobacteria	Rhizobiales	Hyphomicrobiaceae	Hyphomicrobium		0.673144	0.005
Acidobacteria	Acidobacteria-6	iii1-15				0.568085	0.01
Acidobacteria	Acidobacteria-6	iii1-15	mb			0.517555	0.035
Actinobacteria	Actinobacteria	Actinomycetales	Micromonosporaceae			0.5547	0.005
Actinobacteria	Actinobacteria	Actinomycetales	Micromonosporaceae			0.480384	0.035
Actinobacteria	Thermoleophilia	Solirubrobacterales				0.485794	0.045
Proteobacteria	Alphaproteobacteria	Ellin329				0.456116	0.05
Proteobacteria	Alphaproteobacteria	Rhizobiales	Hyphomicrobiaceae			0.538157	0.005
Proteobacteria	Alphaproteobacteria	Rhodospirillales	Rhodospirillaceae			0.527399	0.025
Acidobacteria	Solibacteres	Solibacterales	PAUCf			0.4736	0.03
Bacteroidetes	Sphingobacteriia	Sphingobacteriales	Sphingobacteriaceae	Pedobacter		0.477019	0.045
Proteobacteria	Alphaproteobacteria	Rhodospirillales	Rhodospirillaceae			0.5547	0.045
Proteobacteria	Deltaproteobacteria	Myxococcales				0.632704	0.005
Acidobacteria	Acidobacteria-6	iii1-15				0.508954	0.015
Acidobacteria	Solibacteres	Solibacterales				0.464862	0.05
Actinobacteria	Actinobacteria	Actinomycetales	Promicromonosporaceae	Xylanimicrobium		0.647157	0.005
Chloroflexi	TK10	AKYG885	Dolo_			0.5547	0.005
Gemmatimonadetes	Gemmatimonadetes					0.571618	0.02
Actinobacteria	Actinobacteria	Actinomycetales	Microbacteriaceae			0.676758	0.005
Proteobacteria	Alphaproteobacteria	Rhizobiales				0.480384	0.04
Actinobacteria	Acidimicrobiia	Acidimicrobiales				0.573875	0.015
Proteobacteria	Alphaproteobacteria	Rhizobiales	Brucellaceae	Ochrobactrum		0.5547	0.005
Proteobacteria	Alphaproteobacteria	Rhizobiales	Hyphomicrobiaceae	Rhodoplanes		0.616055	0.005
Acidobacteria	Acidobacteria-6	iii1-15				0.599679	0.015
Proteobacteria	Alphaproteobacteria	Rhizobiales	Hyphomicrobiaceae	Rhodoplanes		0.503382	0.01
Actinobacteria	Actinobacteria	Actinomycetales	Beutenbergiaceae			0.588474	0.025
Actinobacteria	Actinobacteria	Actinomycetales	Pseudonocardiaceae	Jiangella		0.480384	0.025
Actinobacteria	Thermoleophilia	Gaiellales				0.64517	0.005
Nitrospirae	Nitrospira	Nitrospirales	Nitrospiraceae	Nitrospira		0.55683	0.03
Actinobacteria	Actinobacteria	Actinomycetales	Mycobacteriaceae	Mycobacterium		0.534635	0.005
Bacteroidetes	[Saprospirae]	[Saprospirales]	Chitinophagaceae			0.604174	0.005
Proteobacteria	Alphaproteobacteria	Sphingomonadales	Sphingomonadaceae			0.599369	0.025
Actinobacteria	Actinobacteria	Actinomycetales	Micromonosporaceae	Virgisporangium	ochraceum	0.527477	0.015
Actinobacteria	Actinobacteria	Actinomycetales	Pseudonocardiaceae			0.540923	0.035
Proteobacteria	Alphaproteobacteria	Rhizobiales	Hyphomicrobiaceae	Rhodoplanes		0.725785	0.005
Proteobacteria	Alphaproteobacteria	Rhodobacterales	Hyphomonadaceae			0.620174	0.005
Proteobacteria	Betaproteobacteria	Burkholderiales	Comamonadaceae	Rubrivivax		0.703182	0.01
Verrucomicrobia	[Spartobacteria]	[Chthoniobacterales]	[Chthoniobacteraceae]	Chthoniobacter		0.625426	0.005
Actinobacteria	Actinobacteria	Actinomycetales	Micromonosporaceae			0.52668	0.025
Proteobacteria	Alphaproteobacteria	Rhodospirillales	Rhodospirillaceae			0.729167	0.005
Proteobacteria	Alphaproteobacteria	Rhizobiales	Hyphomicrobiaceae	Devosia		0.482007	0.035
Acidobacteria	Solibacteres	Solibacterales				0.650725	0.005
Actinobacteria	Actinobacteria	Actinomycetales	Mycobacteriaceae	Mycobacterium		0.542643	0.01
Proteobacteria	Alphaproteobacteria	Sphingomonadales	Sphingomonadaceae			0.485188	0.04
Verrucomicrobia	[Spartobacteria]	[Chthoniobacterales]	[Chthoniobacteraceae]	Chthoniobacter		0.613004	0.005
Actinobacteria	Actinobacteria	Actinomycetales	Actinosynnemataceae			0.675006	0.005
Actinobacteria	Actinobacteria	Actinomycetales	Pseudonocardiaceae	Pseudonocardia		0.5547	0.03
Bacteroidetes	Cytophagia	Cytophagales	Cytophagaceae			0.608831	0.015
Proteobacteria	Alphaproteobacteria	Rhizobiales	Methylocystaceae	Pleomorphomonas		0.616665	0.005
Proteobacteria	Alphaproteobacteria	Rhizobiales	Phyllobacteriaceae			0.609948	0.015
Verrucomicrobia	Verrucomicrobiae	Verrucomicrobiales	Verrucomicrobiaceae	Luteolibacter		0.623308	0.01
Actinobacteria	Actinobacteria	Actinomycetales	Microbacteriaceae	Cryocola		0.525992	0.045
Planctomycetes	Phycisphaerae	WD2101				0.613315	0.01
Proteobacteria	Alphaproteobacteria	Rhizobiales	Hyphomicrobiaceae			0.5547	0.005
Proteobacteria	Alphaproteobacteria	Rhizobiales	Hyphomicrobiaceae	Hyphomicrobium		0.6582	0.005
Acidobacteria	Acidobacteria-6	iii1-15				0.620174	0.005
Planctomycetes	Planctomycetia	Pirellulales	Pirellulaceae			0.573481	0.025
Planctomycetes	Planctomycetia	Pirellulales	Pirellulaceae			0.613083	0.015
Verrucomicrobia	[Spartobacteria]	[Chthoniobacterales]	[Chthoniobacteraceae]	Candidatus	Xiphinematobacter;	0.649913	0.015
Proteobacteria	Alphaproteobacteria	Rhizobiales	Hyphomicrobiaceae	Pedomicrobium		0.666261	0.01
Actinobacteria	Acidimicrobiia	Acidimicrobiales				0.495169	0.015
Proteobacteria	Alphaproteobacteria	Rhizobiales	Hyphomicrobiaceae	Hyphomicrobium		0.532211	0.03
Proteobacteria	Gammaproteobacteria	Xanthomonadales	Sinobacteraceae	Steroidobacter		0.671215	0.005
Actinobacteria	Thermoleophilia	Solirubrobacterales	Solirubrobacteraceae			0.525248	0.035
Bacteroidetes	Cytophagia	Cytophagales	Cyclobacteriaceae			0.54118	0.025
Proteobacteria	Alphaproteobacteria	Rhizobiales	Rhizobiaceae	Agrobacterium		0.669849	0.01
Actinobacteria	Actinobacteria	Actinomycetales	Nocardioidaceae			0.480384	0.04
Actinobacteria	Actinobacteria	Actinomycetales	Nocardioidaceae	Nocardioides		0.546718	0.035
Bacteroidetes	Cytophagia	Cytophagales	Cytophagaceae	Dyadobacter		0.779292	0.005
Verrucomicrobia	Opitutae	Opitutales	Opitutaceae			0.507222	0.01
Acidobacteria	Acidobacteria-6	iii1-15				0.557992	0.01
Actinobacteria	Actinobacteria	Actinomycetales	Nocardioidaceae			0.532946	0.025
Actinobacteria	Thermoleophilia	Solirubrobacterales				0.52161	0.05
Proteobacteria	Alphaproteobacteria	Rhizobiales				0.468589	0.045
Proteobacteria	Alphaproteobacteria	Rhodospirillales	Rhodospirillaceae			0.616994	0.005
Acidobacteria	[Chloracidobacteria]	RB41				0.532917	0.03
Proteobacteria	Betaproteobacteria	Burkholderiales	Burkholderiaceae			0.687756	0.01
Actinobacteria	Actinobacteria	Actinomycetales	Nocardioidaceae			0.729398	0.015
Actinobacteria	Actinobacteria	Actinomycetales	Streptomycetaceae	Streptomyces		0.589965	0.01
Bacteroidetes	[Saprospirae]	[Saprospirales]	Chitinophagaceae	Flavisolibacter		0.613214	0.01
Actinobacteria	Actinobacteria	Actinomycetales	Pseudonocardiaceae	Pseudonocardia		0.679366	0.005
Planctomycetes	Planctomycetia	Gemmatales	Gemmataceae	Gemmata		0.702798	0.01
Chloroflexi	Gitt-GS-136					0.643003	0.015
Proteobacteria	Alphaproteobacteria	Sphingomonadales	Sphingomonadaceae	Sphingobium		0.484069	0.035
Proteobacteria	Betaproteobacteria	Ellin6067				0.5547	0.005
Actinobacteria	Acidimicrobiia	Acidimicrobiales				0.584671	0.01
Actinobacteria	Thermoleophilia	Solirubrobacterales	Solirubrobacteraceae			0.708455	0.005
Planctomycetes	Planctomycetia	Planctomycetales	Planctomycetaceae	Planctomyces		0.562943	0.015
Proteobacteria	Alphaproteobacteria	Rhodobacterales	Rhodobacteraceae	Paracoccus		0.543031	0.035
Proteobacteria	Betaproteobacteria	Burkholderiales	Comamonadaceae			0.613004	0.005
Acidobacteria	Acidobacteria-6	iii1-15	mb			0.649053	0.005
Actinobacteria	Actinobacteria	Actinomycetales	Beutenbergiaceae			0.593583	0.025
Actinobacteria	Actinobacteria	Actinomycetales	Nocardioidaceae	Nocardioides		0.705468	0.01
Bacteroidetes	Sphingobacteriia	Sphingobacteriales				0.551817	0.01
Chloroflexi	Ellin6529					0.592502	0.005
Proteobacteria	Gammaproteobacteria	Xanthomonadales	Sinobacteraceae			0.553616	0.01
Chloroflexi	S085					0.528237	0.045
Planctomycetes	Planctomycetia	Pirellulales	Pirellulaceae			0.71148	0.01
Acidobacteria	Acidobacteria-6	iii1-15				0.585512	0.01
Actinobacteria	Actinobacteria	Actinomycetales	Actinosynnemataceae			0.539446	0.005
Proteobacteria	Alphaproteobacteria	Rhizobiales	Hyphomicrobiaceae	Rhodoplanes		0.533878	0.015
Proteobacteria	Alphaproteobacteria	Rhizobiales	Rhizobiaceae	Agrobacterium		0.588413	0.015
Proteobacteria	Deltaproteobacteria	Myxococcales				0.548383	0.04
Actinobacteria	Actinobacteria	Actinomycetales	Microbacteriaceae	Agromyces		0.612155	0.005
Proteobacteria	Gammaproteobacteria	34P16				0.617302	0.01
Acidobacteria	Acidobacteria-6	iii1-15				0.491956	0.035
Planctomycetes	Planctomycetia	Gemmatales	Gemmataceae	Gemmata		0.540791	0.025
Actinobacteria	Acidimicrobiia	Acidimicrobiales				0.590166	0.01
Actinobacteria	Acidimicrobiia	Acidimicrobiales				0.548951	0.035
Acidobacteria	Acidobacteria-6	iii1-15				0.544868	0.01
Nitrospirae	Nitrospira	Nitrospirales	-A			0.581329	0.01
Acidobacteria	Acidobacteria-6	iii1-15				0.717894	0.005
Actinobacteria	Acidimicrobiia	Acidimicrobiales	C			0.618699	0.005
Verrucomicrobia	Opitutae					0.722683	0.005
Actinobacteria	Actinobacteria	Actinomycetales	Pseudonocardiaceae			0.53949	0.015
Proteobacteria	Alphaproteobacteria					0.598638	0.005
Acidobacteria	Acidobacteria-6	iii1-15				0.549718	0.005
Actinobacteria	Actinobacteria	Actinomycetales	Streptomycetaceae	Streptomyces		0.600167	0.02
Proteobacteria	Alphaproteobacteria	Sphingomonadales	Sphingomonadaceae	Sphingobium		0.679366	0.005
Planctomycetes	Planctomycetia	Gemmatales	Gemmataceae	Gemmata		0.527477	0.02
Actinobacteria	Actinobacteria	Actinomycetales1570				0.708086	0.005
Actinobacteria	Actinobacteria	Actinomycetales	Nocardioidaceae			0.799487	0.005
Actinobacteria	Actinobacteria	Actinomycetales	Streptomycetaceae	Streptomyces		0.533981	0.04
Bacteroidetes	Cytophagia	Cytophagales	Cytophagaceae			0.480384	0.04
Proteobacteria	Alphaproteobacteria	Sphingomonadales	Erythrobacteraceae			0.567499	0.01
Actinobacteria	Thermoleophilia	Solirubrobacterales				0.673616	0.005
Proteobacteria	Betaproteobacteria	Burkholderiales	Comamonadaceae			0.535619	0.035
Actinobacteria	Actinobacteria	Actinomycetales	Streptomycetaceae	Streptomyces		0.666693	0.005
Proteobacteria	Gammaproteobacteria	Alteromonadales	Alteromonadaceae			0.550516	0.045
Verrucomicrobia	Opitutae	Opitutales	Opitutaceae			0.670482	0.01
Proteobacteria	Alphaproteobacteria	Rhizobiales	Hyphomicrobiaceae	Rhodoplanes		0.672453	0.005
Acidobacteria	Acidobacteria-6	iii1-15				0.722791	0.005
Bacteroidetes	[Saprospirae]	[Saprospirales]	Chitinophagaceae			0.633797	0.005
Proteobacteria	Betaproteobacteria	Ellin6067				0.600399	0.015
Bacteroidetes	[Saprospirae]	[Saprospirales]	Chitinophagaceae			0.620174	0.005
Verrucomicrobia	[Spartobacteria]	[Chthoniobacterales]	[Chthoniobacteraceae]	Candidatus	Xiphinematobacter;	0.638948	0.02
Acidobacteria	Acidobacteria-6	iii1-15	mb			0.548613	0.01
Actinobacteria	Actinobacteria	Actinomycetales	Corynebacteriaceae	Corynebacterium		0.571772	0.005
Verrucomicrobia	[Spartobacteria]	[Chthoniobacterales]	[Chthoniobacteraceae]	Chthoniobacter		0.773616	0.005
Acidobacteria	Acidobacteria-6	iii1-15				0.720027	0.005
Actinobacteria	Actinobacteria	Actinomycetales	Nocardiaceae			0.685237	0.005
Acidobacteria	[Chloracidobacteria]	RB41				0.521773	0.035
Proteobacteria	Gammaproteobacteria	Xanthomonadales	Xanthomonadaceae	Arenimonas		0.567586	0.015
Planctomycetes	Planctomycetia	Planctomycetales	Planctomycetaceae	Planctomyces		0.520061	0.035
Proteobacteria	Gammaproteobacteria	Xanthomonadales	Sinobacteraceae			0.548806	0.04
Actinobacteria	Actinobacteria	Actinomycetales	Nocardioidaceae			0.752785	0.005
Proteobacteria	Deltaproteobacteria	Myxococcales				0.595019	0.015
Proteobacteria	Alphaproteobacteria	Rhodospirillales				0.666744	0.005
Actinobacteria	Actinobacteria	Actinomycetales				0.491482	0.03
Actinobacteria	Thermoleophilia	Solirubrobacterales	Solirubrobacteraceae			0.765693	0.005
Proteobacteria	Alphaproteobacteria	Rhodobacterales	Rhodobacteraceae			0.599104	0.015
Acidobacteria	[Chloracidobacteria]	RB41				0.531092	0.02
Planctomycetes	Planctomycetia	Gemmatales	Gemmataceae	Gemmata		0.646059	0.02
Proteobacteria	Betaproteobacteria	Burkholderiales	Comamonadaceae			0.695812	0.005
Actinobacteria	Thermoleophilia	Solirubrobacterales				0.634984	0.005
Actinobacteria	Thermoleophilia	Solirubrobacterales	Solirubrobacteraceae			0.516503	0.045
Proteobacteria	Alphaproteobacteria	Sphingomonadales	Sphingomonadaceae	Sphingopyxis	alaskensis	0.657037	0.005
Acidobacteria	Solibacteres	Solibacterales				0.657297	0.005
Nitrospirae	Nitrospira	Nitrospirales	-A			0.491615	0.05
Proteobacteria	Alphaproteobacteria	Sphingomonadales	Sphingomonadaceae	Sphingopyxis		0.565369	0.015
Proteobacteria	Betaproteobacteria	Burkholderiales	Comamonadaceae			0.694414	0.015
Actinobacteria	Actinobacteria	Actinomycetales	Microbacteriaceae	Salinibacterium		0.504365	0.045
Actinobacteria	Actinobacteria	Actinomycetales	Pseudonocardiaceae	Pseudonocardia		0.587352	0.03
Proteobacteria	Alphaproteobacteria	Rhodospirillales	Rhodospirillaceae			0.648928	0.03
Acidobacteria	Acidobacteria-6	iii1-15				0.623579	0.005
Actinobacteria	Actinobacteria	Actinomycetales	Streptomycetaceae	Streptomyces		0.665025	0.015
Proteobacteria	Deltaproteobacteria	Syntrophobacterales	Syntrophobacteraceae			0.696176	0.005
Actinobacteria	Actinobacteria	Actinomycetales	Microbacteriaceae			0.574585	0.03
Actinobacteria	Actinobacteria	Actinomycetales	Pseudonocardiaceae			0.618344	0.005
Actinobacteria	Actinobacteria	Actinomycetales	Promicromonosporaceae	Promicromonospora		0.689388	0.005
Proteobacteria	Gammaproteobacteria	Xanthomonadales	Sinobacteraceae			0.698739	0.005
Actinobacteria	Actinobacteria	Actinomycetales	Nocardioidaceae			0.595909	0.01
Planctomycetes	Planctomycetia	Pirellulales	Pirellulaceae			0.599253	0.02
Proteobacteria	Betaproteobacteria	Burkholderiales	Comamonadaceae			0.548851	0.025
Planctomycetes	Planctomycetia	Pirellulales	Pirellulaceae			0.65263	0.03
Proteobacteria	Alphaproteobacteria	Rhizobiales	Hyphomicrobiaceae	Rhodoplanes		0.536469	0.03
Proteobacteria	Alphaproteobacteria	Sphingomonadales	Sphingomonadaceae			0.706453	0.005
Acidobacteria	Solibacteres	Solibacterales				0.65158	0.005
Nitrospirae	Nitrospira	Nitrospirales	-A			0.617957	0.01
Gemmatimonadetes	Gemm-1					0.573371	0.025
Proteobacteria	Deltaproteobacteria	Syntrophobacterales	Syntrophobacteraceae			0.690251	0.005
Proteobacteria	Alphaproteobacteria	Rhizobiales	Phyllobacteriaceae			0.657364	0.01
Proteobacteria	Alphaproteobacteria	Rhodospirillales	Rhodospirillaceae			0.681215	0.005
Actinobacteria	Actinobacteria	Actinomycetales	Streptomycetaceae	Streptomyces		0.626589	0.005
Planctomycetes	Planctomycetia	Pirellulales	Pirellulaceae			0.712633	0.005
Proteobacteria	Alphaproteobacteria	Caulobacterales	Caulobacteraceae			0.617011	0.01
Actinobacteria	Acidimicrobiia	Acidimicrobiales	C			0.770288	0.005
Actinobacteria	Actinobacteria	Actinomycetales	Nocardioidaceae			0.709931	0.005
Acidobacteria	[Chloracidobacteria]	RB41				0.55869	0.045
Acidobacteria	Sva0725	Sva0725				0.539426	0.025
Actinobacteria	Thermoleophilia	Solirubrobacterales				0.65154	0.02
Proteobacteria	Gammaproteobacteria	Xanthomonadales	Sinobacteraceae			0.528455	0.035
Proteobacteria	Alphaproteobacteria	Rhizobiales	Hyphomicrobiaceae	Devosia		0.761909	0.005
Proteobacteria	Alphaproteobacteria	Rhodobacterales	Hyphomonadaceae			0.634892	0.02
Planctomycetes	Planctomycetia	Planctomycetales	Planctomycetaceae	Planctomyces		0.687209	0.015
Actinobacteria	Actinobacteria	Actinomycetales	Pseudonocardiaceae	Pseudonocardia		0.662602	0.015
Proteobacteria	Betaproteobacteria	Burkholderiales	Comamonadaceae			0.541884	0.03
Bacteroidetes	Cytophagia	Cytophagales	Cytophagaceae			0.617919	0.015
Proteobacteria	Alphaproteobacteria	Rhodobacterales	Hyphomonadaceae			0.670395	0.005
Proteobacteria	Betaproteobacteria	Burkholderiales	Comamonadaceae	Ramlibacter		0.808342	0.005
Bacteroidetes	[Saprospirae]	[Saprospirales]	Chitinophagaceae			0.535051	0.04
Acidobacteria	Solibacteres	Solibacterales				0.651863	0.005
Actinobacteria	Rubrobacteria	Rubrobacterales	Rubrobacteraceae	Rubrobacter		0.541431	0.04
Actinobacteria	Thermoleophilia	Solirubrobacterales				0.704438	0.005
Proteobacteria	Alphaproteobacteria	Rhizobiales	Hyphomicrobiaceae	Rhodoplanes		0.574233	0.01
Proteobacteria	Deltaproteobacteria	Myxococcales				0.613262	0.005
Actinobacteria	Thermoleophilia	Solirubrobacterales				0.594071	0.02
Proteobacteria	Alphaproteobacteria	Rhizobiales	Phyllobacteriaceae			0.677797	0.005
Acidobacteria	Acidobacteria-6	CCU21				0.554623	0.01
Actinobacteria	Actinobacteria	Actinomycetales	Nocardioidaceae			0.673298	0.02
Gemmatimonadetes	Gemmatimonadetes					0.620174	0.005
Actinobacteria	Thermoleophilia	Solirubrobacterales				0.60131	0.01
Proteobacteria	Alphaproteobacteria	Rhizobiales	Hyphomicrobiaceae	Devosia		0.767745	0.005
Proteobacteria	Alphaproteobacteria	Rhizobiales	Hyphomicrobiaceae	Rhodoplanes		0.561827	0.01
Actinobacteria	Actinobacteria	Actinomycetales	Streptomycetaceae	Streptomyces		0.539272	0.02
Proteobacteria	Alphaproteobacteria	Rhizobiales	Hyphomicrobiaceae	Rhodoplanes		0.787094	0.005
Bacteroidetes	[Saprospirae]	[Saprospirales]	Chitinophagaceae			0.475857	0.045
Chloroflexi	S085					0.5547	0.005
Proteobacteria	Alphaproteobacteria	Caulobacterales	Caulobacteraceae	Phenylobacterium		0.870027	0.005
Proteobacteria	Alphaproteobacteria	Rhizobiales	Hyphomicrobiaceae	Devosia		0.743793	0.005
Acidobacteria	Acidobacteria-6	iii1-15				0.586699	0.02
Actinobacteria	Thermoleophilia	Gaiellales	Gaiellaceae			0.532263	0.025
Proteobacteria	Betaproteobacteria	Burkholderiales	Comamonadaceae	Rubrivivax		0.739384	0.01
Actinobacteria	Thermoleophilia	Solirubrobacterales	Solirubrobacteraceae			0.664554	0.005
Proteobacteria	Gammaproteobacteria	Xanthomonadales	Xanthomonadaceae	Luteimonas		0.750501	0.015
Actinobacteria	Actinobacteria	Actinomycetales1795				0.847647	0.005
Proteobacteria	Alphaproteobacteria	Caulobacterales	Caulobacteraceae			0.604867	0.02
Bacteroidetes	Cytophagia	Cytophagales	Cyclobacteriaceae			0.5547	0.025
Proteobacteria	Gammaproteobacteria	Xanthomonadales	Sinobacteraceae			0.680468	0.005
Chloroflexi	Ellin6529					0.479724	0.05
Actinobacteria	Actinobacteria	Actinomycetales	Nocardioidaceae			0.819947	0.005
Actinobacteria	Actinobacteria	Actinomycetales	Streptomycetaceae	Streptomyces		0.662204	0.01
Actinobacteria	Actinobacteria	Actinomycetales	Sporichthyaceae	Sporichthya		0.75189	0.015
Proteobacteria	Alphaproteobacteria	Sphingomonadales	Sphingomonadaceae	Kaistobacter		0.522343	0.04
Bacteroidetes	[Saprospirae]	[Saprospirales]	Chitinophagaceae			0.722264	0.005
Acidobacteria	Acidobacteria-6	iii1-15				0.557164	0.015
Actinobacteria	Actinobacteria	Actinomycetales	Pseudonocardiaceae	Pseudonocardia		0.54005	0.045
Actinobacteria	MB-A2-108	0319-7L14				0.633207	0.02
Acidobacteria	Acidobacteria-6	iii1-15				0.644288	0.015
Proteobacteria	Alphaproteobacteria	Rhizobiales	Hyphomicrobiaceae	Devosia		0.70655	0.005
Acidobacteria	Acidobacteria-6	iii1-15				0.481286	0.03
Actinobacteria	Rubrobacteria	Rubrobacterales	Rubrobacteraceae	Rubrobacter		0.620174	0.01
Proteobacteria	Alphaproteobacteria	Rhizobiales	Phyllobacteriaceae			0.734498	0.005
Bacteroidetes	Cytophagia	Cytophagales	Cytophagaceae			0.825694	0.005
Proteobacteria	Alphaproteobacteria	Rhizobiales	Phyllobacteriaceae			0.796083	0.005
Acidobacteria	Acidobacteria-6	iii1-15				0.613321	0.01
Acidobacteria	Acidobacteria-6	iii1-15				0.56385	0.02
Verrucomicrobia	[Pedosphaerae]	[Pedosphaerales]	Ellin			0.623441	0.015
Actinobacteria	Acidimicrobiia	Acidimicrobiales				0.673757	0.005
Acidobacteria	Acidobacteria-6	iii1-15				0.557403	0.04
Actinobacteria	Actinobacteria	Actinomycetales	Actinosynnemataceae			0.616814	0.005
Nitrospirae	Nitrospira	Nitrospirales	-A			0.639537	0.01
Proteobacteria	Alphaproteobacteria	Rhizobiales	Hyphomicrobiaceae	Devosia		0.731942	0.005
Proteobacteria	Gammaproteobacteria	Alteromonadales	Alteromonadaceae	Cellvibrio		0.707444	0.005
Actinobacteria	Acidimicrobiia	Acidimicrobiales	Iamiaceae	Iamia		0.54459	0.045
Actinobacteria	Acidimicrobiia	Acidimicrobiales	AKIW			0.663507	0.01
Actinobacteria	Acidimicrobiia	Acidimicrobiales	C			0.715212	0.005
Proteobacteria	Alphaproteobacteria	Rhizobiales	Hyphomicrobiaceae	Devosia		0.595171	0.05
Acidobacteria	Acidobacteria-6	iii1-15				0.684919	0.02
Actinobacteria	Actinobacteria	Actinomycetales	Nocardioidaceae			0.798211	0.005
Actinobacteria	Actinobacteria	Actinomycetales	Cryptosporangiaceae			0.52557	0.05
Proteobacteria	Alphaproteobacteria	Rhizobiales	Hyphomicrobiaceae	Pedomicrobium		0.706479	0.005
Actinobacteria	Acidimicrobiia	Acidimicrobiales	C			0.776281	0.005
Actinobacteria	Actinobacteria	Actinomycetales	Pseudonocardiaceae	Pseudonocardia		0.570153	0.045
Actinobacteria	Acidimicrobiia	Acidimicrobiales	C			0.711939	0.005
Bacteroidetes	Cytophagia	Cytophagales	Cytophagaceae			0.691097	0.005
Proteobacteria	Alphaproteobacteria	Rhizobiales	Phyllobacteriaceae			0.655593	0.01
Actinobacteria	Thermoleophilia	Gaiellales	Gaiellaceae			0.531086	0.04
Actinobacteria	Actinobacteria	Actinomycetales	Nocardiaceae	Nocardia		0.679366	0.005
Actinobacteria	Acidimicrobiia	Acidimicrobiales	EB			0.565668	0.015
Proteobacteria	Alphaproteobacteria	Caulobacterales	Caulobacteraceae			0.480384	0.04
Proteobacteria	Gammaproteobacteria	Xanthomonadales	Xanthomonadaceae			0.654087	0.015
Actinobacteria	Actinobacteria	Actinomycetales	Nocardioidaceae	Kribbella		0.784465	0.005
Proteobacteria	Alphaproteobacteria	Rhodobacterales	Hyphomonadaceae			0.731556	0.005
Proteobacteria	Alphaproteobacteria	Rhizobiales	Hyphomicrobiaceae	Devosia		0.65447	0.015
Proteobacteria	Betaproteobacteria	Burkholderiales	Comamonadaceae			0.720655	0.005
Proteobacteria	Gammaproteobacteria	Alteromonadales	Alteromonadaceae	Microbulbifer		0.673644	0.005
Actinobacteria	Acidimicrobiia	Acidimicrobiales	EB			0.546118	0.045
Planctomycetes	Phycisphaerae	WD2101				0.773049	0.01
Actinobacteria	Actinobacteria	Actinomycetales	Streptomycetaceae	Streptomyces	aculeolatus	0.614055	0.005
Actinobacteria	Actinobacteria	Actinomycetales	Streptomycetaceae	Streptomyces		0.771199	0.005
Proteobacteria	Gammaproteobacteria	Alteromonadales	Alteromonadaceae	Microbulbifer		0.633353	0.015
Actinobacteria	Rubrobacteria	Rubrobacterales	Rubrobacteraceae	Rubrobacter		0.564959	0.045
Actinobacteria	Actinobacteria	Actinomycetales	Promicromonosporaceae			0.672992	0.01
Actinobacteria	Actinobacteria	Actinomycetales	Nocardioidaceae			0.707323	0.005
Actinobacteria	Actinobacteria	Actinomycetales	Mycobacteriaceae	Mycobacterium		0.852118	0.005
Acidobacteria	Acidobacteria-6	iii1-15				0.525908	0.025
Proteobacteria	Alphaproteobacteria	Rhizobiales	Hyphomicrobiaceae	Devosia		0.739326	0.005
Acidobacteria	Acidobacteria-6	iii1-15	mb			0.692456	0.015
Actinobacteria	Actinobacteria	Actinomycetales	Nocardioidaceae			0.690098	0.005
Actinobacteria	Actinobacteria	Actinomycetales	Pseudonocardiaceae	Pseudonocardia		0.766313	0.005
Gemmatimonadetes	Gemm-1					0.673995	0.015
Proteobacteria	Alphaproteobacteria	Rhizobiales	Hyphomicrobiaceae	Devosia		0.637372	0.02
Proteobacteria	Alphaproteobacteria	Sphingomonadales	Sphingomonadaceae	Sphingomonas	wittichii	0.70938	0.02
Actinobacteria	Actinobacteria	Actinomycetales	Nocardioidaceae	Aeromicrobium		0.787755	0.005
Proteobacteria	Gammaproteobacteria	Xanthomonadales	Xanthomonadaceae	Lysobacter	brunescens	0.780772	0.005
Proteobacteria	Alphaproteobacteria	Rhizobiales	Hyphomicrobiaceae	Rhodoplanes		0.817121	0.005
Actinobacteria	Thermoleophilia	Solirubrobacterales				0.524616	0.025
Actinobacteria	Actinobacteria	Actinomycetales	Promicromonosporaceae	Promicromonospora		0.5547	0.005
Proteobacteria	Alphaproteobacteria	Rhizobiales	Hyphomicrobiaceae			0.675381	0.005
Acidobacteria	Acidobacteria-6	iii1-15				0.736684	0.005
Actinobacteria	Thermoleophilia	Solirubrobacterales				0.715583	0.015
Proteobacteria	Alphaproteobacteria	Rhizobiales	Hyphomicrobiaceae			0.672285	0.005
Acidobacteria	Acidobacteria-6	iii1-15				0.761412	0.015
Actinobacteria	Actinobacteria	Actinomycetales	Pseudonocardiaceae	Pseudonocardia	halophobica	0.811455	0.005
Proteobacteria	Alphaproteobacteria	Rhizobiales	Phyllobacteriaceae	Mesorhizobium		0.674054	0.005
Actinobacteria	Actinobacteria	Actinomycetales	Pseudonocardiaceae			0.790201	0.005
Planctomycetes	Planctomycetia	Planctomycetales	Planctomycetaceae	Planctomyces		0.630201	0.005
Proteobacteria	Alphaproteobacteria	Rhizobiales				0.543189	0.045
Actinobacteria	Thermoleophilia	Solirubrobacterales				0.591197	0.01
Actinobacteria	Actinobacteria	Actinomycetales	Nocardioidaceae			0.74874	0.005
Proteobacteria	Gammaproteobacteria	Xanthomonadales	Sinobacteraceae			0.782672	0.005
Proteobacteria	Alphaproteobacteria	Rhodospirillales				0.752293	0.005
Proteobacteria	Alphaproteobacteria	Rhizobiales	Phyllobacteriaceae			0.968937	0.005
Acidobacteria	[Chloracidobacteria]	RB41				0.635091	0.01
Proteobacteria	Alphaproteobacteria	Rhizobiales	Hyphomicrobiaceae	Devosia		0.790455	0.005
Proteobacteria	Alphaproteobacteria	Rhizobiales	Methylocystaceae	Methylopila		0.541838	0.03
Proteobacteria	Deltaproteobacteria	Myxococcales				0.793669	0.005
Proteobacteria	Alphaproteobacteria	Rhodospirillales	Rhodospirillaceae			0.756615	0.005
Proteobacteria	Betaproteobacteria	Burkholderiales	Comamonadaceae	Hylemonella		0.635037	0.015
Proteobacteria	Gammaproteobacteria	Xanthomonadales	Sinobacteraceae			0.655816	0.005
Proteobacteria	Alphaproteobacteria	Rhizobiales	Hyphomicrobiaceae			0.760603	0.005
Proteobacteria	Alphaproteobacteria	Caulobacterales	Caulobacteraceae	Mycoplana		0.5481	0.035
Proteobacteria	Alphaproteobacteria	Sphingomonadales	Sphingomonadaceae	Kaistobacter		0.679109	0.005
Proteobacteria	Alphaproteobacteria	Rhizobiales				0.821543	0.005
Actinobacteria	Actinobacteria	Actinomycetales	Streptomycetaceae	Streptomyces		0.753288	0.005
Nitrospirae	Nitrospira	Nitrospirales	Nitrospiraceae	Nitrospira		0.641613	0.015
Actinobacteria	Acidimicrobiia	Acidimicrobiales				0.790479	0.005
Planctomycetes	Planctomycetia	Pirellulales	Pirellulaceae			0.81338	0.005
Bacteroidetes	Cytophagia	Cytophagales	Cytophagaceae			0.521135	0.005
Actinobacteria	Actinobacteria	Actinomycetales	Mycobacteriaceae	Mycobacterium		0.515709	0.035
Proteobacteria	Gammaproteobacteria	Legionellales	Coxiellaceae	Rickettsiella		0.608523	0.025
Actinobacteria	Thermoleophilia	Solirubrobacterales	Solirubrobacteraceae			0.707255	0.005
Proteobacteria	Alphaproteobacteria	Rhizobiales	Phyllobacteriaceae	Mesorhizobium		0.888993	0.005
Proteobacteria	Alphaproteobacteria	Rhizobiales	Phyllobacteriaceae			0.85695	0.005
Acidobacteria	[Chloracidobacteria]	RB41	Ellin			0.755068	0.005
Actinobacteria	Thermoleophilia	Solirubrobacterales	Solirubrobacteraceae			0.560781	0.005
Acidobacteria	Acidobacteria-6	iii1-15				0.679366	0.005
Acidobacteria	Acidobacteria-6	iii1-15				0.564626	0.02
Proteobacteria	Alphaproteobacteria	Sphingomonadales	Sphingomonadaceae			0.771397	0.005
Proteobacteria	Alphaproteobacteria	Rhizobiales	Phyllobacteriaceae	Mesorhizobium		0.825622	0.01
Proteobacteria	Alphaproteobacteria	Sphingomonadales	Sphingomonadaceae			0.775476	0.005
Actinobacteria	Actinobacteria	Actinomycetales	Nocardioidaceae	Kribbella		0.620174	0.005
Acidobacteria	[Chloracidobacteria]	RB41	Ellin			0.574777	0.01
Proteobacteria	Gammaproteobacteria	Xanthomonadales	Sinobacteraceae	Steroidobacter		0.816549	0.005
Actinobacteria	Actinobacteria	Actinomycetales	Streptomycetaceae	Streptomyces		0.761006	0.005
Proteobacteria	Alphaproteobacteria	Rhizobiales	Rhizobiaceae	Rhizobium		0.541839	0.03
Proteobacteria	Alphaproteobacteria	Rhizobiales	Hyphomicrobiaceae			0.841566	0.005
Actinobacteria	Actinobacteria	Actinomycetales	Mycobacteriaceae	Mycobacterium		0.886224	0.005
Proteobacteria	Alphaproteobacteria	Rhodospirillales	Rhodospirillaceae			0.645118	0.02
Proteobacteria	Alphaproteobacteria	Rhizobiales	Phyllobacteriaceae	Mesorhizobium		0.834751	0.01
Proteobacteria	Alphaproteobacteria	Sphingomonadales	Sphingomonadaceae			0.857754	0.005
Actinobacteria	Acidimicrobiia	Acidimicrobiales	C			0.727395	0.005
Proteobacteria	Gammaproteobacteria	Xanthomonadales	Xanthomonadaceae	Luteimonas		0.860935	0.005
Proteobacteria	Alphaproteobacteria	Sphingomonadales	Sphingomonadaceae			0.82095	0.005
Acidobacteria	[Chloracidobacteria]	RB41				0.591716	0.015
Actinobacteria	Actinobacteria	Actinomycetales	Intrasporangiaceae			0.663344	0.01
Proteobacteria	Alphaproteobacteria	Rhodospirillales	Rhodospirillaceae			0.772672	0.005
Actinobacteria	Actinobacteria	Actinomycetales	Pseudonocardiaceae	Pseudonocardia		0.807122	0.005
Proteobacteria	Alphaproteobacteria	Rhizobiales	Bradyrhizobiaceae			0.788542	0.005
Acidobacteria	Acidobacteria-6	iii1-15				0.672486	0.005
Proteobacteria	Alphaproteobacteria	Caulobacterales	Caulobacteraceae	Phenylobacterium		0.857789	0.005
Proteobacteria	Alphaproteobacteria	Rhizobiales				0.672054	0.01
Proteobacteria	Alphaproteobacteria	Rhodospirillales	Rhodospirillaceae			0.813876	0.005
Actinobacteria	Actinobacteria	Actinomycetales	Nocardioidaceae	Aeromicrobium		0.913393	0.005
Actinobacteria	Actinobacteria	Actinomycetales	Microbacteriaceae			0.898195	0.005
Bacteroidetes	Cytophagia	Cytophagales	Cytophagaceae			0.782822	0.005
Proteobacteria	Gammaproteobacteria	Xanthomonadales	Xanthomonadaceae			0.805248	0.005
Acidobacteria	Acidobacteria-6	iii1-15				0.650485	0.015
Actinobacteria	Actinobacteria	Actinomycetales	Nocardioidaceae	Nocardioides		0.860714	0.005
Proteobacteria	Alphaproteobacteria	Rhizobiales	Bradyrhizobiaceae			0.888422	0.005
Proteobacteria	Gammaproteobacteria	Xanthomonadales	Sinobacteraceae			0.886818	0.005
Actinobacteria	Thermoleophilia	Solirubrobacterales	Solirubrobacteraceae			0.891371	0.005
Bacteroidetes	Cytophagia	Cytophagales	Cytophagaceae			0.746975	0.005
Acidobacteria	Acidobacteria-6	iii1-15				0.858546	0.005
Actinobacteria	Actinobacteria	Actinomycetales	Pseudonocardiaceae	Pseudonocardia		0.870724	0.005
Proteobacteria	Alphaproteobacteria	Rhizobiales	Hyphomicrobiaceae	Rhodoplanes		0.924271	0.005
Actinobacteria	Actinobacteria	Actinomycetales	Microbacteriaceae	Agromyces		0.803165	0.005
Proteobacteria	Alphaproteobacteria	Rhizobiales	Hyphomicrobiaceae	Rhodoplanes		0.52641	0.03
Proteobacteria	Alphaproteobacteria	Rhodospirillales	Rhodospirillaceae			0.811153	0.005
Proteobacteria	Alphaproteobacteria	Sphingomonadales	Erythrobacteraceae			0.780837	0.015
Proteobacteria	Alphaproteobacteria	Rhizobiales	Hyphomicrobiaceae	Devosia		0.825055	0.005
Acidobacteria	Acidobacteria-6	iii1-15				0.630667	0.015
Proteobacteria	Alphaproteobacteria	Rhizobiales				0.790888	0.01
Proteobacteria	Alphaproteobacteria	Rhodospirillales	Rhodospirillaceae	Inquilinus		0.574251	0.02
Actinobacteria	Actinobacteria	Actinomycetales	Mycobacteriaceae	Mycobacterium		0.770355	0.005
Acidobacteria	Acidobacteria-6	iii1-15				0.806323	0.005
Proteobacteria	Alphaproteobacteria	Rhizobiales				0.866681	0.005
Actinobacteria	Actinobacteria	Actinomycetales	Promicromonosporaceae	Xylanimicrobium		0.865517	0.005
Actinobacteria	Actinobacteria	Actinomycetales	Promicromonosporaceae	Xylanimicrobium		0.811503	0.005
Actinobacteria	Acidimicrobiia	Acidimicrobiales	AKIW			0.875561	0.005
Proteobacteria	Gammaproteobacteria	Thiotrichales	Piscirickettsiaceae			0.76741	0.005
Actinobacteria	Actinobacteria	Actinomycetales	Mycobacteriaceae	Mycobacterium		0.987415	0.005
Proteobacteria	Gammaproteobacteria	Xanthomonadales	Sinobacteraceae	Steroidobacter		0.800425	0.005
Actinobacteria	Actinobacteria	Actinomycetales	Mycobacteriaceae	Mycobacterium		0.853414	0.01
Actinobacteria	Actinobacteria	Actinomycetales	Pseudonocardiaceae	Pseudonocardia		0.811506	0.01
